# Supplementary material
Source: PubMed Central journal article supplement (PMC2651351)
Supplement: 0807699106_0807699106SI.pdf [file 0807699106_0807699106SI.pdf]

# Supporting Information

Edwards *et al.* 10.1073/pnas.0807699106

1. Sinden RR (1994) *DNA Structure and Function* (Academic, San Diego).
2. Dere R, Napierala M, Ranum LP, Wells RD (2004) Hairpin structure-forming propensity of the (CCTG-CAGG) tetranucleotide repeats contributes to the genetic instability associated with myotonic dystrophy type 2. *J Biol Chem* 279:41715–41726.
3. Brown T, Hunter WN, Kneale G, Kennard O (1986) Molecular structure of the G-A base pair in DNA and its implications for the mechanism of transversion mutations. *Proc Natl Acad Sci USA* 83:2402–2406.
4. Aboul-ela F, Koh D, Tinoco I, Jr, Martin FH (1985) Base-base mismatches. Thermodynamics of double helix formation for dCA3XA3G + dCT3YT3G (X, Y = A,C,G,T). *Nucleic Acids Res* 13:4811–4824.
5. Kato M, *et al.* (2003) Interarm interaction of DNA cruciform forming at a short inverted repeat sequence. *Biophys J* 85:402–408.
6. Kato M, Matsunaga K, Shimizu N (1998) A novel unusual DNA structure formed in an inverted repeat sequence. *Biochem Biophys Res Commun* 246:532–534.
7. Sinden RR, *et al.* (2002) Triplet repeat DNA structures and human genetic disease: Dynamic mutations from dynamic DNA. *J Biosci* 27:53–65.

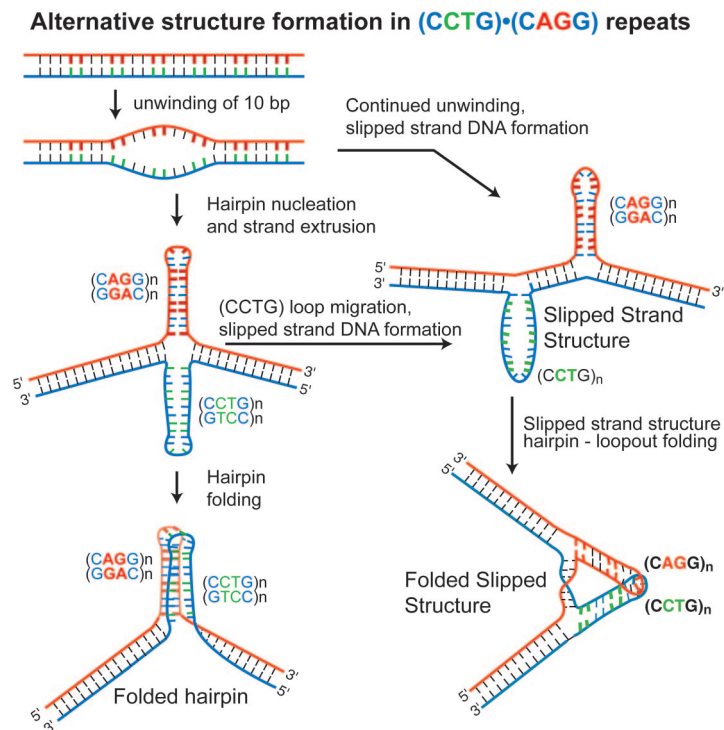

**Fig. S1.** Alternative structure formation in (CCTG) $\cdot$ (CAGG) repeats. This figure shows possible pathways to alternative DNA structure formation in (CCTG) $\cdot$ (CAGG) repeats as driven by DNA supercoiling. Supercoiling may promote DNA helix unwinding within the (CCTG) $\cdot$ (CAGG) repeats. A 10-bp unwound region is needed to allow nucleation of base pairing within an inverted repeat leading to cruciform extrusion (see ref. 1 for review). Similarly, nucleation may initiate in the (CAGG) strand, as this strand can form a hairpin, while the (CCTG) strand remains unpaired (2). The (CAGG) strand hairpin could be stabilized by 2 C-G base pairs and 2 G·A(*syn*) mispairs, which are stabilized by 2 hydrogen bonds and retain a phosphate-phosphate spacing very similar to that found in canonical A-T or C-G base pairs (3, 4). The hairpins may interact, resulting in a folded hairpin, which has been observed previously in certain inverted repeats (5, 6). This, however, may not be very stable, and it may branch migrate back into a linear form when supercoiling is lost. Alternatively, the (CCTG) loop may migrate, forming a canonical slipped-strand structure. This may be followed by folding and hairpin loop-hairpin loop interaction resulting in a folded slipped-strand structure, as observed previously for (CTG) $\cdot$ (CAG) slipped-strand DNA structures (7).
